# Supplementary material for: The Transcriptomic Profiles of ESR1 and MMP3 Stratify the Risk of Biochemical Recurrence in Primary Prostate Cancer beyond Clinical Features
Source: MDPI journal article supplement (doi:10.3390/ijms24098399), 2023-05-07
Supplement: s1 [file s1]

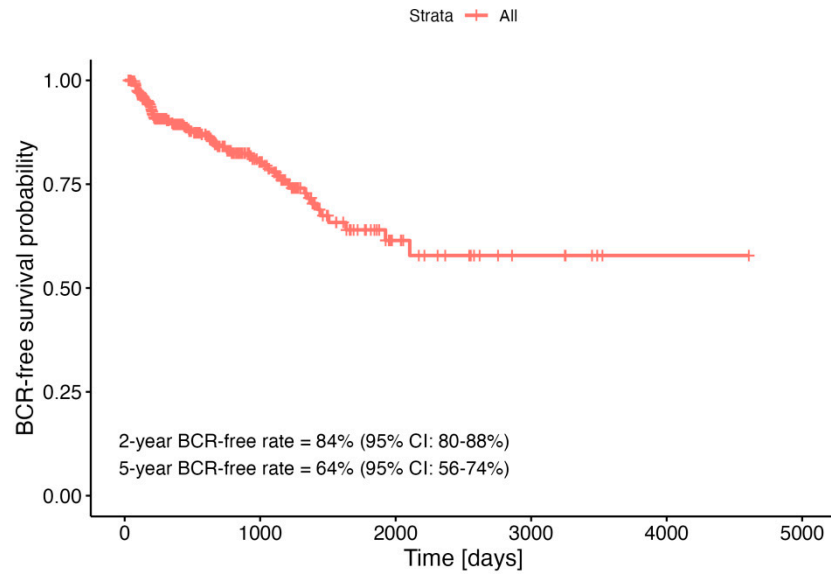

**Supplementary Figure S1.** BCR-free survival of the TCGA PRAD cohort.

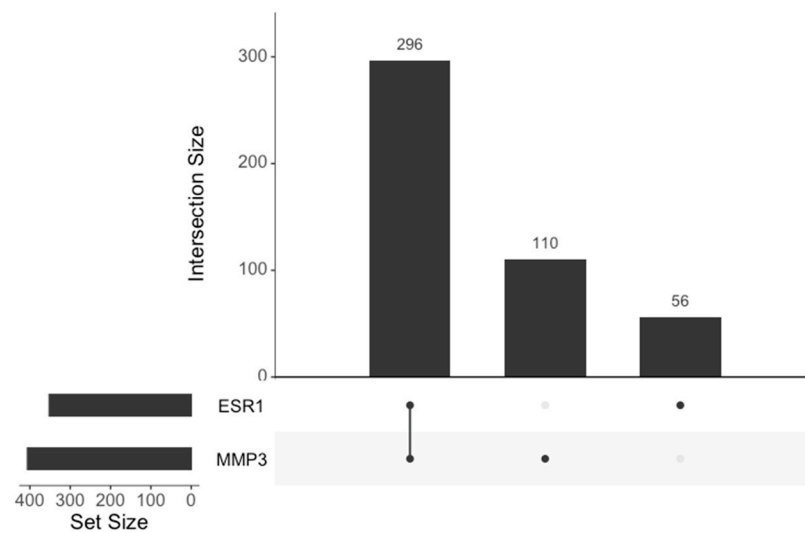

**Supplementary Figure S2.** The UpSet plot revealed a subgroup of 296 PRAD patients sharing unfavorable molecular signature of ESR1 and MMP3 altering the BCR-free survival (hereinafter called the “strata”).

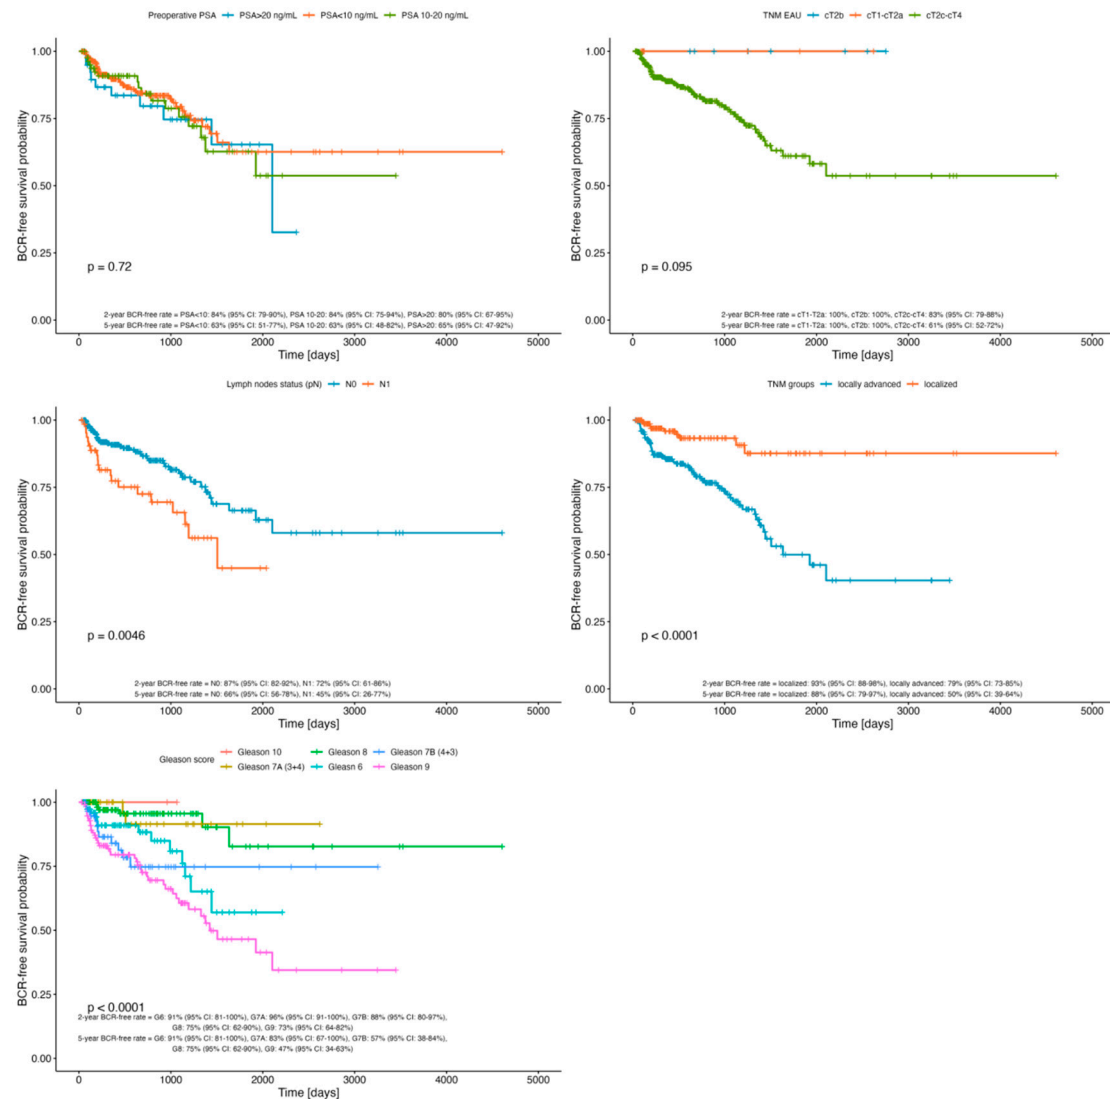

**Supplementary Figure S3.** Kaplan-Meier curves showing significant differences in BCR-free rates regarding lymph nodes status ( $p = 0.0046$ ), TNM groups ( $p < 0.0001$ ) as well as Gleason score ( $p < 0.0001$ ), in contrast to groups of preoperative PSA and TNM categories by EAU, which did not stratify BCR-free survival of PRAD patients in a significant manner ( $p = 0.72$ ,  $p = 0.095$ , respectively).

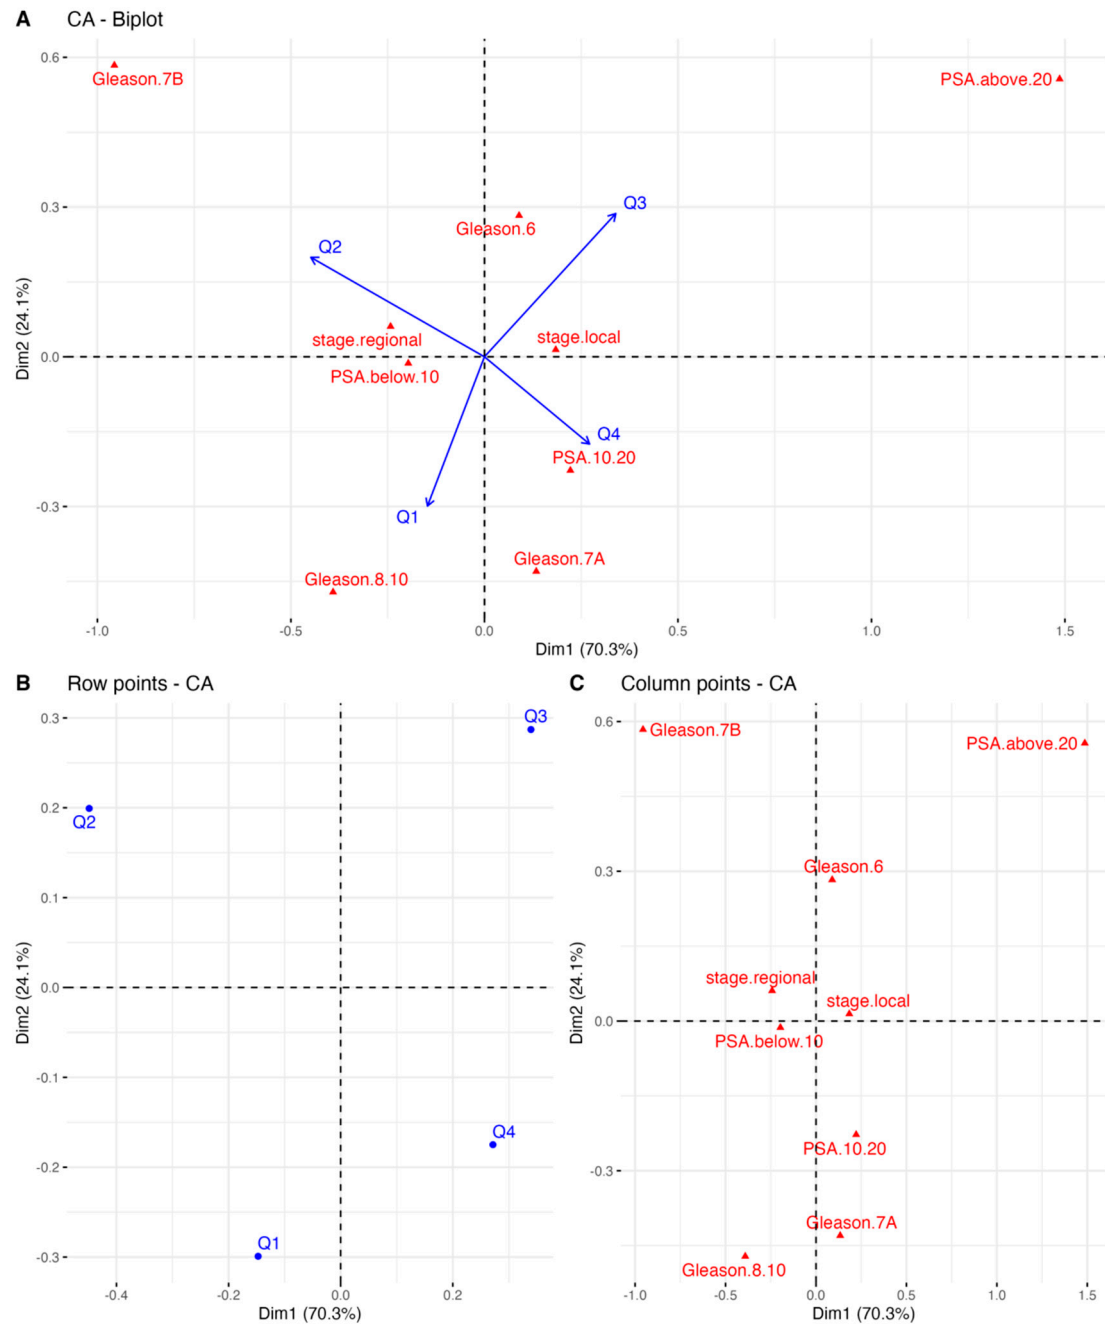

**Supplementary Figure S4.** The CA plot for cross-validation data of the **A)** representation of both, expression quantiles of *ESR1* and *MMP3* and clinical typologies, **B)** only row variables, i.e. quantiles, and **C)** the distribution of the column points only, i.e. clinical variables, partitioned along the two first dimensions of total variability reaching 94.4%.

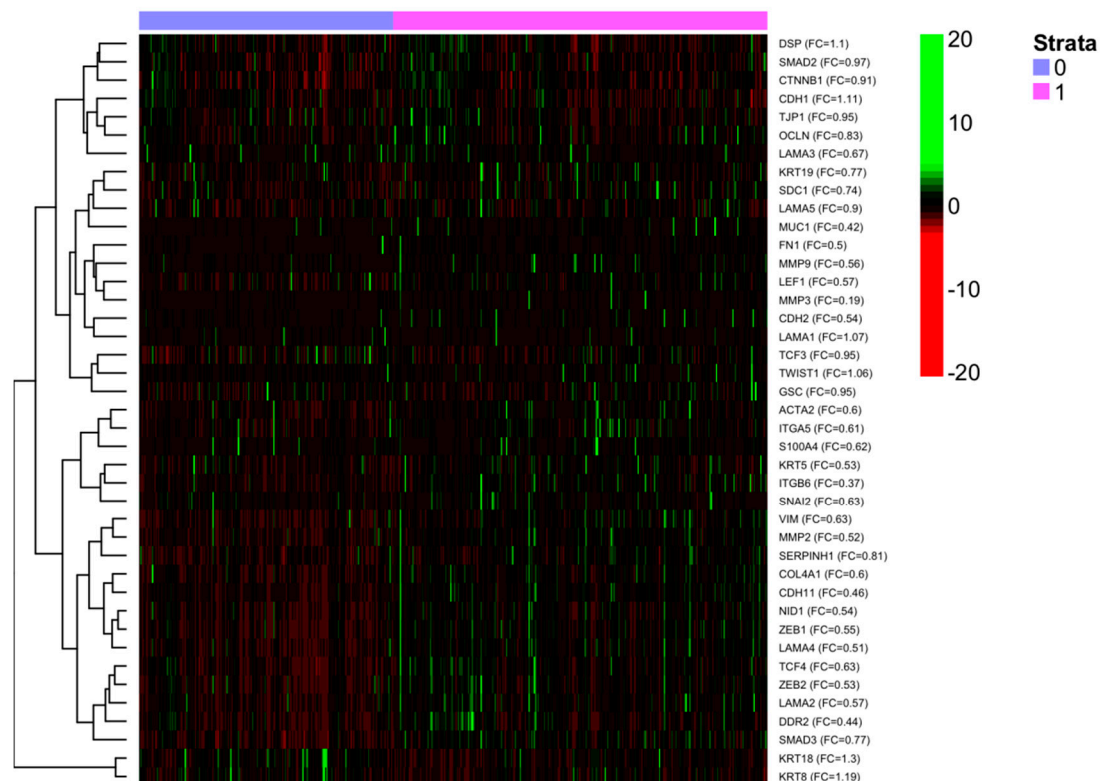

**Supplementary Figure S5.** The transcriptomic profiling of the 41 major EMT markers among PRAD patients grouped by the identified strata (unfavorable expression profiles of *ESR1* and *MMP3*). Additionally, for each gene fold change (FC) of expression between strata-negative and strata-positive subgroups has been calculated.
